# Supplementary material
Source: Royal Society of Chemistry journal article supplement (doi:10.1039/d6an00069j)
Supplement: d6an00069j1.pdf [file d6an00069j1.pdf]

Supporting Table S1. Method validation and metabolite identification levels.

| Name                | Ion mode | Regression Equation           | R <sup>2</sup> | Dynamic range (ng/mL) | Precision(%) | Intra-day | Inter-day | Quantification Level | MSI Identification Level |
|---------------------|----------|-------------------------------|----------------|-----------------------|--------------|-----------|-----------|----------------------|--------------------------|
| Cytosine            | Positive | y=4998659.16528+369670.61499x | 0.999          | 2.5-250               | 3.4          | 6.1       | 8.3       | Absolute             | Level 1                  |
| Spermidine          | Positive | y=188549.71848+39175.1024x    | 0.996          | 10-1000               | 8.7          | 5.3       | 12.6      | Absolute             | Level 1                  |
| Purine              | Positive | y=185708.20634+115.26714x     | 0.991          | 150-2000              | 1.4          | 9.3       | 12.5      | Absolute             | Level 1                  |
| Adenosine           | Positive | y=976331.93727+209001.73862x  | 0.995          | 10-2000               | 3.6          | 6.5       | 8.1       | Absolute             | Level 1                  |
| Putrescine          | Positive | y=2543452.9865+19365.70759x   | 0.997          | 150-800               | 1.3          | 11.1      | 16        | Absolute             | Level 1                  |
| Methionine          | Positive | y=2.14767E7+14424.51009x      | 0.993          | 25-800                | 1.9          | 4.2       | 4.7       | Absolute             | Level 1                  |
| Spermine            | Positive | y=-825752.06855+25198.93879x  | 1              | 250-2000              | 5.9          | 8         | 9.3       | Absolute             | Level 1                  |
| SAM                 | Positive | y=986250.94562+96028.96715x   | 0.999          | 2.5-500               | 2.5          | 16.8      | 11.8      | Absolute             | Level 1                  |
| SAH                 | Positive | y=280242.50825+16528.30909x   | 0.997          | 2.5-500               | 4.9          | 13.6      | 19.2      | Absolute             | Level 1                  |
| DHF                 | Positive | y=-142.84932+1653.30538x      | 0.998          | 2.5-500               | 6.5          | 9.8       | 15.1      | Absolute             | Level 1                  |
| Folinic acid        | Positive | y=42226.03727+52509.01898x    | 0.998          | 2.5-500               | 8.2          | 11.3      | 13.5      | Absolute             | Level 1                  |
| Thymine             | Positive | y=8736771.41603+101463.96643x | 0.995          | 10-400                | 0.9          | 1.3       | 2.6       | Absolute             | Level 1                  |
| Adenine             | Positive | y=5452230.28398+14329.77004x  | 0.992          | 150-1000              | 0.8          | 6.8       | 6         | Absolute             | Level 1                  |
| N,N-Dimethylglycine | Positive | y=360008.18923+97.06685x      | 0.995          | 200-4000              | 4            | 11.6      | 6.8       | Absolute             | Level 1                  |
| Valine              | Positive | y=174046.47511+0.47091x       | 0.956          | 10000-40000           | 0.7          | 4.2       | 3.1       | Absolute             | Level 1                  |
| 4-Hydroxystyrene    | Positive | y=111930.39315+91.82407x      | 0.983          | 150-2000              | 0.5          | 8.6       | 6.1       | Absolute             | Level 1                  |
| Leucine             | Positive | y=1162414.1623+89.75245x      | 0.966          | 500-10000             | 0.5          | 2.7       | 4.5       | Absolute             | Level 1                  |
| Isoleucine          | Positive | y=1361768.17982+192.93907x    | 0.993          | 3000-20000            | 1.3          | 2.7       | 4.9       | Absolute             | Level 1                  |
| Asparagine          | Positive | y=21134.87712+52.37244x       | 0.998          | 150-800               | 0.3          | 2.4       | 5.2       | Absolute             | Level 1                  |
| ornithine           | Positive | y=1796797.0736+52.37244x      | 0.996          | 3000-20000            | 1.3          | 2.3       | 4.5       | Absolute             | Level 1                  |
| Stachydrine         | Positive | y=516446.10552+76.57705x      | 0.982          | 3000-16000            | 0.7          | 7.8       | 4.7       | Absolute             | Level 1                  |

| Name                    | Ion mode | Regression Equation        | R <sup>2</sup> | Dynamic range (ng/mL) | Precision(%) | Intra-day | Inter-day | Quantification Level | MSI Identification Level |
|-------------------------|----------|----------------------------|----------------|-----------------------|--------------|-----------|-----------|----------------------|--------------------------|
| Glutamate               | Positive | y=54765.00774+6.43096x     | 0.996          | 500-16000             | 1.9          | 2.9       | 4.4       | Absolute             | Level 1                  |
| Xanthine                | Positive | y=575945.7401+273.03039x   | 0.984          | 500-20000             | 1.3          | 8.6       | 2.5       | Absolute             | Level 1                  |
| 3-Methylxanthine        | Positive | y=10325.35353+410.59364x   | 0.992          | 2.5-800               | 6.5          | 2.3       | 8.2       | Absolute             | Level 1                  |
| LPC 14:0                | Positive | y=140957.79116+358.42456x  | 0.992          | 100-6000              | 5.5          | 11.3      | 11.2      | Absolute             | Level 1                  |
| nicotinic acid          | Positive | y=2172.39071+174.69202x    | 0.994          | 2.5-2000              | 7.1          | 10.7      | 13.9      | Absolute             | Level 1                  |
| Tryptamine              | Positive | y=1393.62654+792.63039x    | 0.994          | 2.5-500               | 4.9          | 8.6       | 13.6      | Absolute             | Level 1                  |
| 4-hydroxycinnamic acid  | Positive | y=77393.39337+211.4045x    | 0.991          | 150-2000              | 9.1          | 11.7      | 6.4       | Absolute             | Level 1                  |
| IAA                     | Positive | y=396741.1254+807.4704x    | 0.99           | 10-1000               | 2.8          | 4.2       | 5.1       | Absolute             | Level 1                  |
| xanthurenic acid        | Positive | y=86779.01858+2299.0701x   | 0.992          | 2.5-500               | 1.8          | 6.4       | 18.4      | Absolute             | Level 1                  |
| (R)-(Indol-3-yl)lactate | Positive | y=20309.66466+118.47489x   | 0.993          | 2.5-500               | 3.4          | 2.6       | 8.1       | Absolute             | Level 1                  |
| 4-Aminophenol           | Positive | y=3036.62088+3.95638x      | 0.992          | 10-800                | 3.3          | 3         | 7.1       | Absolute             | Level 1                  |
| 5-HT                    | Positive | y=1930.14727+43.54929x     | 0.996          | 2.5-2000              | 3.9          | 6.2       | 4         | Absolute             | Level 1                  |
| Kynurenine              | Positive | y=87910.08682+115.63348x   | 0.992          | 10-1000               | 2.3          | 9.1       | 13.6      | Absolute             | Level 1                  |
| LPC 15:0                | Positive | y=630072.39015+2934.04808x | 0.994          | 2.5-500               | 3            | 16.5      | 12.5      | Absolute             | Level 1                  |
| N-Methylnicotinamide    | Positive | y=29454.15405+2722.30738x  | 0.996          | 2.5-1000              | 2.1          | 5.9       | 7.8       | Absolute             | Level 1                  |
| N-Methylnicotinic acid  | Positive | y=93498.92823+121.58726x   | 0.992          | 150-800               | 4.4          | 9.3       | 5.4       | Absolute             | Level 1                  |
| Try                     | Positive | y=147331.3857+52.14089x    | 0.995          | 10-1000               | 1.1          | 4.5       | 5.2       | Absolute             | Level 1                  |
| kynurenic acid          | Positive | y=5964.61698+4.32385x      | 0.996          | 2.5-2000              | 1.9          | 9.3       | 9.3       | Absolute             | Level 1                  |
| Melatonin               | Positive | y=28451.45065+2118.30389x  | 1              | 25-1000               | 2.3          | 2.4       | 3.8       | Absolute             | Level 1                  |
| MIAA                    | Positive | y=54464.74+53.67283x       | 0.994          | 10-1000               | 1.1          | 4.1       | 5.5       | Absolute             | Level 1                  |
| N-Acetyl-5-HT           | Positive | y=5030.79256+2673.80507x   | 0.992          | 2.5-300               | 4.6          | 1.7       | 10.7      | Absolute             | Level 1                  |

| Name          | Ion mode | Regression Equation             | R <sup>2</sup> | Dynamic range (ng/mL) | Precision(%) | Intra-day | Inter-day | Quantification Level | MSI Identification Level |
|---------------|----------|---------------------------------|----------------|-----------------------|--------------|-----------|-----------|----------------------|--------------------------|
| Guanine       | Positive | $y=-69201.30506+3690440.45677x$ | 0.997          | 0.01P-1P              | 9.1          | 13.4      | 13.8      | Absolute             | Level 1                  |
| Uracil        | Positive | $y=-88278.11191+6417315.54076x$ | 0.999          | 0.01P-1P              | 4.7          | 2.5       | 10.4      | Absolute             | Level 1                  |
| Homocysteine  | Positive | $y=41168.30051+275502.0232x$    | 0.993          | 0.01P-5P              | 3.5          | 1.4       | 1.7       | Absolute             | Level 1                  |
| 10-formyl-THF | Positive | $y=734.55767+4779.1687x$        | 0.986          | 0.01P-5P              | 7.8          | 14.8      | 9.4       | Absolute             | Level 1                  |
| LPC O-16:0    | Positive | $y=3550031.56862+6.42245E7x$    | 0.995          | 0.01P-5P              | 3.5          | 17.6      | 11.2      | Absolute             | Level 1                  |
| Hypoxanthine  | Positive | $y=4262633.60072+1.00655E8x$    | 0.999          | 0.01P-5P              | 1.5          | 10        | 4.7       | Absolute             | Level 1                  |
| LPC P-18:0    | Positive | $y=224313.07432+2.07956E7x$     | 0.999          | 0.01P-5P              | 9.6          | 14.1      | 11.6      | Absolute             | Level 1                  |
| LPC 17:0      | Positive | $y=4589264.26306+9.7439E7x$     | 0.998          | 0.01P-5P              | 2.5          | 4.9       | 10.2      | Absolute             | Level 1                  |
| LPC 22:6      | Positive | $y=-4612350.90073+2.01388E8x$   | 0.997          | 0.01P-0.5P            | 4.3          | 4.3       | 13.3      | Absolute             | Level 1                  |
| LPC 20:5      | Positive | $y=1113470.01809+5.6132E7x$     | 0.999          | 0.01P-5P              | 1.4          | 9.6       | 11.9      | Absolute             | Level 1                  |
| LPC 15:1      | Positive | $y=746317.81598+3.92777E7x$     | 0.995          | 0.01P-5P              | 1.3          | 12.9      | 11.7      | Absolute             | Level 1                  |
| LPC 16:3      | Positive | $y=-565535.38503+2.03243E7x$    | 0.999          | 0.01P-5P              | 1.6          | 7.5       | 13.8      | Absolute             | Level 1                  |
| LPC 20:3      | Positive | $y=26503.56876+2458197.78638x$  | 0.998          | 0.01P-5P              | 8            | 11.7      | 16.5      | Absolute             | Level 1                  |
| C 18:1        | Positive | $y=115.3118+6273.14543x$        | 1              | 0.01P-5P              | 9.8          | 16.4      | 13.5      | Absolute             | Level 1                  |
| LPC 18-OH_1   | Positive | $y=-559.12591+22513.2604x$      | 0.989          | 0.01P-1P              | 1.2          | 15.1      | 18.2      | Absolute             | Level 1                  |
| C 18:1-OH     | Positive | $y=4.48337+2980.2719x$          | 1              | 0.01P-5P              | 7            | 16.1      | 13.9      | Absolute             | Level 1                  |
| C 20:5        | Positive | $y=53.40996+1986.42511x$        | 0.999          | 0.05P-5P              | 2.6          | 8         | 11.5      | Absolute             | Level 1                  |
| C 18:2        | Positive | $y=-6540.14941+533557.25434x$   | 0.998          | 0.02P-2.5P            | 1.6          | 5         | 10.6      | Absolute             | Level 1                  |
| LPC 15:1_1    | Positive | $y=3643.0095+327047.29274x$     | 0.997          | 0.01P-2.5P            | 2.3          | 12.9      | 11.7      | Absolute             | Level 1                  |
| C 16-OH       | Positive | $y=120.1127+28681.70385x$       | 0.999          | 0.01P-0.5P            | 4.2          | 12.8      | 14.2      | Absolute             | Level 1                  |
| C 18          | Positive | $y=754.20522+113484.78863x$     | 0.998          | 0.01P-2.5P            | 4.3          | 13.8      | 12.6      | Absolute             | Level 1                  |

| Name       | Ion mode | Regression Equation          | R <sup>2</sup> | Dynamic range (ng/mL) | Precision(%) | Intra-day | Inter-day | Quantification Level | MSI Identification Level |
|------------|----------|------------------------------|----------------|-----------------------|--------------|-----------|-----------|----------------------|--------------------------|
| LPC 16:3_1 | Positive | y=-9322.20034+346167.02343x  | 0.999          | 0.01P-2.5P            | 1.6          | 17.5      | 13.8      | Absolute             | Level 1                  |
| C 18-OH    | Positive | y=-82.6504+5588.89371x       | 0.997          | 0.01P-0.5P            | 1.9          | 15.8      | 13.3      | Absolute             | Level 1                  |
| LPC 20:3_1 | Positive | y=723.00331+21410.9807x      | 0.999          | 0.01P-5P              | 9.5          | 11.7      | 16.5      | Absolute             | Level 1                  |
| C 14:3     | Positive | y=-164.89312+34396.16561x    | 0.999          | 0.01P-0.5P            | 3.4          | 4.6       | 11        | Absolute             | Level 1                  |
| w49-UK     | Positive | y=22937.87699+15401.11434x   | 0.994          | 0.01P-2.5P            | 8.7          | 9         | 13.8      | Semi-quantitative    | Level 4                  |
| w52-UK     | Positive | y=1160.21102 +8858.97212x    | 0.931          | 0.01P-0.5P            | 2.3          | 10.3      | 5.4       | Semi-quantitative    | Level 4                  |
| w54-UK     | Positive | y=328.9804+12099.1758x       | 0.97           | 0.01P-0.5P            | 4.8          | 8.5       | 5.6       | Semi-quantitative    | Level 4                  |
| w55-UK     | Positive | y=10791.14274+660269.84764 x | 0.998          | 0.01P-0.5P            | 1.9          | 17.2      | 8.8       | Semi-quantitative    | Level 4                  |
| w56-UK     | Positive | y=112.68593+1267.81048x      | 1              | 0.01P-5P              | 3.1          | 12.7      | 11.2      | Semi-quantitative    | Level 4                  |
| w57-UK     | Positive | y=24.98419 +32485.91081x     | 0.999          | 0.01P-0.5P            | 1.9          | 7.7       | 6.7       | Semi-quantitative    | Level 4                  |
| w58-UK     | Positive | y=14828.37258+643021.99468x  | 1              | 0.01P-5P              | 6            | 8.4       | 12        | Semi-quantitative    | Level 4                  |
| w59-UK     | Positive | y=-1455.39412+169922.12155 x | 0.997          | 0.01P-0.5P            | 6            | 17.1      | 12.6      | Semi-quantitative    | Level 4                  |
| 4.3        | 13.3     | y=4472.27733 +6008.38664x    | 0.999          | 0.01P-5P              | 1.9          | 7.6       | 14        | Absolute             | Level 1                  |
| w62-UK     | Positive | y=75912.39442+125436.29832x  | 1              | 0.01P-5P              | 9            | 15        | 13.2      | Semi-quantitative    | Level 4                  |
| w63 -UK    | Positive | y=131.81452+1048.10702 x     | 0.993          | 0.01P-1P              | 1.3          | 16.2      | 32.3      | Semi-quantitative    | Level 4                  |
| w64 -UK    | Positive | y=-2398.3161+223905.33566x   | 0.997          | 0.01P-0.5P            | 8.9          | 4.5       | 13.2      | Semi-quantitative    | Level 4                  |

| Name          | Ion mode | Regression Equation           | R <sup>2</sup> | Dynamic range (ng/mL) | Precision(%) | Intra-day | Inter-day | Quantification Level | MSI Identification Level |
|---------------|----------|-------------------------------|----------------|-----------------------|--------------|-----------|-----------|----------------------|--------------------------|
| w65-UK        | Positive | y=38757.18893+10439.12945x    | 0.998          | 0.01P-5P              | 3.2          | 7.8       | 7.4       | Semi-quantitative    | Level 4                  |
| w66-UK        | Positive | y=-2406.64374+576229.31286 x  | 0.999          | 0.01P-0.5P            | 2.6          | 15.3      | 12.4      | Semi-quantitative    | Level 4                  |
| w67-UK        | Positive | y=10884.10336+24101.81461x    | 1              | 0.01P-2.5P            | 4.8          | 16.1      | 13        | Semi-quantitative    | Level 4                  |
| w68-UK        | Positive | y=-964.57876+154994.82737x    | 0.992          | 0.01P-0.5P            | 8.7          | 8.9       | 12.5      | Semi-quantitative    | Level 4                  |
| w69-UK        | Positive | y=1562.60877+159559.72377x    | 0.999          | 0.01P-0.5P            | 2.6          | 6.2       | 8         | Semi-quantitative    | Level 4                  |
| w70-UK        | Positive | y=493.41562+8643.72246x       | 1              | 0.01P-2.5P            | 6.7          | 15.7      | 10.5      | Semi-quantitative    | Level 4                  |
| w71-UK        | Positive | y=24193.10939+167904.7486x    | 0.999          | 0.01P-0.5P            | 4.3          | 10.9      | 18.2      | Semi-quantitative    | Level 4                  |
| w72-UK        | Positive | y=-2897.52261+315894.31872x   | 1              | 0.01P-2.5P            | 9            | 17.4      | 12.9      | Semi-quantitative    | Level 4                  |
| w74-UK        | Positive | y=2477.95298+24141.43327x     | 0.996          | 0.01P-5P              | 5.5          | 10.4      | 5         | Semi-quantitative    | Level 4                  |
| w75-UK        | Positive | y=8656.8634+908691.06533x     | 0.997          | 0.01P-2.5P            | 2.8          | 2.5       | 10.4      | Semi-quantitative    | Level 4                  |
| LPC 16:2      | Positive | y=2290.63877+118508.49252x    | 0.998          | 0.01P-5P              | 9            | 11.8      | 10.6      | Absolute             | Level 1                  |
| w53-UK        | Positive | y=-634.85937+42490.3211x      | 1              | 0.01P-2.5P            | 8.6          | 10.5      | 14.4      | Semi-quantitative    | Level 4                  |
| w61-UK        | Positive | y=-2540.45394+482836.03395x   | 0.998          | 0.01P-0.5P            | 5            | 6.8       | 12.9      | Semi-quantitative    | Level 4                  |
| Creatinine    | Positive | y=195202.76525+2193589.37124x | 0.964          | 0.01P-0.5P            | 0.5          | 1         | 5.5       | Absolute             | Level 1                  |
| Acetylcholine | Positive | y=17585.73881+750622.60847x   | 0.994          | 0.01P-0.5P            | 9.6          | 14.8      | 6.4       | Absolute             | Level 1                  |
| LPC 16:0      | Positive | y=+1.43316E7x                 | 1              | 0.01P-1P              | 7.2          | 4.6       | 9.9       | Absolute             | Level 1                  |

| Name                              | Ion mode | Regression Equation          | R <sup>2</sup> | Dynamic range (ng/mL) | Precision(%) | Intra-day | Inter-day | Quantification Level | MSI Identification Level |
|-----------------------------------|----------|------------------------------|----------------|-----------------------|--------------|-----------|-----------|----------------------|--------------------------|
| N,N-dimethyl-C20 Phytosphingosine | Positive | y=633.30565+9229.22392x      | 1              | 0.01P-2.5P            | 1.3          | 8.9       | 11.1      | Absolute             | Level 1                  |
| C22 Phytosphingosine              | Positive | y=391.731+3630.69868x        | 1              | 0.01P-2.5P            | 8.7          | 16.1      | 11.9      | Absolute             | Level 1                  |
| Sarmentogenin                     | Positive | y=-521.46778+302542.28224x   | 1              | 0.01P-0.5P            | 1.7          | 13.8      | 17.1      | Absolute             | Level 1                  |
| LPC O-16:0                        | Positive | y=-10195.24735+445212.49213x | 0.994          | 0.01P-0.5P            | 2.4          | 17.6      | 11.2      | Absolute             | Level 1                  |
| LPC 15:0                          | Positive | y=-2869.03063+358043.98541x  | 1              | 0.01P-2.5P            | 2.6          | 15.2      | 11        | Absolute             | Level 1                  |
| Hypoxanthine                      | Positive | y=3400.77059+246162.63591x   | 0.998          | 0.01P-0.5P            | 1.8          | 10        | 4.7       | Absolute             | Level 1                  |
| LPC 16:1                          | Positive | y=-186642.56645+7748920x     | 0.996          | 0.01P-0.5P            | 1.5          | 16.4      | 12.1      | Absolute             | Level 1                  |
| LPC 18:0                          | Positive | y=21703.35378+3119180x       | 0.997          | 0.01P-0.5P            | 6.1          | 9.6       | 8.2       | Absolute             | Level 1                  |
| LPC P-18:0                        | Positive | y=12216.63428+364512.75963x  | 0.994          | 0.01P-5P              | 9.2          | 14.1      | 11.6      | Absolute             | Level 1                  |
| LPC 17:1                          | Positive | y=-2463.40875+129194.24468x  | 0.997          | 0.01P-0.5P            | 9.1          | 2.9       | 9.9       | Absolute             | Level 1                  |
| LPC 17:0                          | Positive | y=2521.06448+658302.92466x   | 0.998          | 0.01P-2.5P            | 1.9          | 4.9       | 10.2      | Absolute             | Level 1                  |
| LPC(18:0e)                        | Positive | y=48768.8868+4726150x        | 0.997          | 0.01P-2.5P            | 3            | 5.7       | 10.1      | Absolute             | Level 1                  |
| LPC 20:4                          | Positive | y=-81227.6788+3008540x       | 0.992          | 0.01P-0.5P            | 8.3          | 12        | 9.8       | Absolute             | Level 1                  |
| LPC 20:2                          | Positive | y=-221.1471+33564.71719x     | 1              | 0.01P-2.5P            | 7.7          | 14.1      | 11.8      | Absolute             | Level 1                  |
| LPC 20:1                          | Positive | y=-2069.13621+84135.5648x    | 1              | 0.01P-2.5P            | 8            | 14.3      | 13.3      | Absolute             | Level 1                  |
| LPC 22:6                          | Positive | y=-81801.00697+3847150x      | 0.997          | 0.01P-0.5P            | 6.7          | 9.3       | 10.5      | Absolute             | Level 1                  |
| C14 sphingosine                   | Positive | y=6245.21033+2867.52413x     | 0.993          | 0.01P-5P              | 8            | 15.7      | 15.7      | Absolute             | Level 1                  |
| α-Amino octanoic acid             | Positive | y=5536.38355+106347.90167x   | 0.997          | 0.01P-2.5P            | 2.6          | 2.4       | 5.9       | Absolute             | Level 1                  |
| C16 Sphinganine                   | Positive | y=2296.90303+127475.66117x   | 0.998          | 0.01P-0.5P            | 8.7          | 11.4      | 12        | Absolute             | Level 1                  |
| C16 Phytosphingosine              | Positive | y=480.08355+7008.99857x      | 1              | 0.01P-2.5P            | 7.4          | 18.5      | 12.7      | Absolute             | Level 1                  |
| Carnitine C10:1                   | Positive | y=5221.18184+1960900x        | 0.999          | 0.01P-0.5P            | 1.9          | 4.3       | 10.6      | Absolute             | Level 1                  |

| Name                | Ion mode | Regression Equation         | R <sup>2</sup> | Dynamic range (ng/mL) | Precision(%) | Intra-day | Inter-day | Quantification Level | MSI Identification Level |
|---------------------|----------|-----------------------------|----------------|-----------------------|--------------|-----------|-----------|----------------------|--------------------------|
| Carnitine C10:0-OH  | Positive | y=-73.27684+108048.99838x   | 0.999          | 0.01P-0.5P            | 3            | 3.6       | 10.9      | Absolute             | Level 1                  |
| Carnitine C12:0-OH  | Positive | y=820.1964+23432.5093x      | 0.997          | 0.01P-2.5P            | 3.1          | 3.2       | 11.2      | Absolute             | Level 1                  |
| Carnitine C14:1     | Positive | y=-1426.56948+297644.3217x  | 1              | 0.01P-2.5P            | 1.9          | 17.4      | 12.9      | Absolute             | Level 1                  |
| Carnitine C14:2-OH  | Positive | y=907.85519+19779.67412x    | 0.998          | 0.01P-5P              | 3.5          | 2.8       | 12.2      | Absolute             | Level 1                  |
| Palmitoyl-Carnitine | Positive | y=-51.83132+225326.55139x   | 0.998          | 0.01P-2.5P            | 1.2          | 15.7      | 12.2      | Absolute             | Level 1                  |
| Carnitine C16:2-OH  | Positive | y=-127.31249+16061.30876x   | 0.999          | 0.01P-0.5P            | 9.2          | 12.4      | 12.4      | Absolute             | Level 1                  |
| LPC(16:0)-OH        | Positive | y=-422.33246+20914.14024x   | 0.996          | 0.01P-0.5P            | 9.2          | 16.5      | 12.2      | Absolute             | Level 1                  |
| LPC 20:5            | Positive | y=-11928.65939+1310930x     | 0.999          | 0.01P-2.5P            | 9.4          | 19.6      | 11.9      | Absolute             | Level 1                  |
| Carnitine C8-OH     | Positive | y=433.73537+238012.64779x   | 1              | 0.01P-0.5P            | 2.8          | 5.3       | 9.4       | Absolute             | Level 1                  |
| Indoleacetonitrile  | Positive | y=687.76456+11457.96525x    | 0.996          | 0.01P-0.5P            | 2.7          | 10        | 9.9       | Absolute             | Level 1                  |
| Tyr                 | Positive | y=653.94153+106360.69464x   | 1              | 0.01P-0.5P            | 2.5          | 8.9       | 5.7       | Absolute             | Level 1                  |
| 5-HTP               | Positive | y=223.3375+4655.28659x      | 0.996          | 0.01P-1P              | 9.9          | 15        | 9.2       | Absolute             | Level 1                  |
| Phytosphingosine    | Positive | y=56.23497+2144.33687x      | 1              | 0.01P-2.5P            | 2.7          | 17.6      | 12        | Absolute             | Level 1                  |
| 5-HIAA              | Positive | y=252.82292+158151.20736x   | 1              | 0.01P-0.5P            | 1.4          | 6.1       | 7         | Absolute             | Level 1                  |
| indoleacrylic acid  | Positive | y=974.06094+143029.12993x   | 1              | 0.01P-0.5P            | 0.4          | 3.5       | 5.9       | Absolute             | Level 1                  |
| IPA                 | Positive | y=820.16481+368839.78536x   | 1              | 0.01P-0.5P            | 0.5          | 12        | 8.5       | Absolute             | Level 1                  |
| Indole              | Positive | y=-1841.7944+977651.40694x  | 0.999          | 0.01P-0.5P            | 3            | 37.7      | 9.5       | Absolute             | Level 1                  |
| nicotinamide        | Positive | y=1800.03782+125554.39686x  | 0.995          | 0.01P-1P              | 0.4          | 1.3       | 5.6       | Absolute             | Level 1                  |
| LPC 18:3            | Positive | y=-2216.7264+63660.52682x   | 0.999          | 0.01P-2.5P            | 2.1          | 7         | 10.1      | Absolute             | Level 1                  |
| Taurine             | Negative | y=2620887.57126+1785.29802x | 0.996          | 10-2000               | 2.2          | 9.4       | 6.8       | Absolute             | Level 1                  |
| Phenylalanine       | Negative | y=4954.96978+3.99642x       | 0.997          | 250-2000              | 2.5          | 2.5       | 1.5       | Absolute             | Level 1                  |

| Name                      | Ion mode | Regression Equation         | R <sup>2</sup> | Dynamic range (ng/mL) | Precision(%) | Intra-day | Inter-day | Quantification Level | MSI Identification Level |
|---------------------------|----------|-----------------------------|----------------|-----------------------|--------------|-----------|-----------|----------------------|--------------------------|
| Glutamine                 | Negative | y=1594.82508+6.64784x       | 1              | 2.5-400               | 3.7          | 3.4       | 8.2       | Absolute             | Level 1                  |
| LPE 18:1                  | Negative | y=76553.10488+87.23141x     | 0.985          | 2.5-1000              | 2.8          | 2.8       | 3.3       | Absolute             | Level 1                  |
| Succinic acid             | Negative | y=358.07577+0.44446x        | 0.899          | 25-1000               | 2            | 14.6      | 5.9       | Absolute             | Level 1                  |
| Hydroxyisocaproic acid    | Negative | y=2365.13484+62.46671x      | 1              | 2.5-1000              | 2.9          | 11.8      | 3.3       | Absolute             | Level 1                  |
| N-Methyl-aspartic acid    | Negative | y=20107.73481+29.12907x     | 1              | 10-1000               | 3.3          | 3         | 3.1       | Absolute             | Level 1                  |
| Tauroursodeoxycholic acid | Negative | y=-1916.27521+26.10003x     | 0.999          | 250-1000              | 8.3          | 16.7      | 3.4       | Absolute             | Level 1                  |
| Oxoglutaric acid          | Negative | y=86806.51451+33.91172x     | 0.932          | 150-1000              | 9.9          | 9.1       | 5.5       | Absolute             | Level 1                  |
| Pyruvic acid              | Negative | y=1016.29733+1.14511x       | 0.998          | 150-2000              | 3.4          | 3.3       | 3.8       | Absolute             | Level 1                  |
| Aspartate                 | Negative | y=949.18721+2.18541x        | 0.995          | 25-500                | 4.2          | 5.3       | 5         | Absolute             | Level 1                  |
| phenyllactate             | Negative | y=-14856.14371+1271.38842x  | 0.995          | 2.5-2000              | 5.2          | 14.3      | 2.7       | Absolute             | Level 1                  |
| indole-3-carboxylic acid  | Negative | y=-10608.58336+651.39281x   | 0.996          | 2.5-1000              | 5.9          | 17.3      | 1.9       | Absolute             | Level 1                  |
| indolepropionic acid      | Negative | y=5037.29288+17.97507x      | 0.993          | 2.5-800               | 2.4          | 9.3       | 15.5      | Absolute             | Level 1                  |
| Indoxyl sulfate           | Negative | y=79433.0004+155.67734x     | 0.994          | 2.5-1000              | 2.3          | 2.3       | 2.5       | Absolute             | Level 1                  |
| LPC 18:0                  | Negative | y=-2257644.11652+2.18669E8x | 0.999          | 0.01P-0.5P            | 3.9          | 9.6       | 8.2       | Absolute             | Level 1                  |
| Gluconic acid             | Negative | y=90.22338+506.6143x        | 0.996          | 0.01P-2P              | 3.4          | 3.3       | 1.6       | Absolute             | Level 1                  |
| LPE 18:3                  | Negative | y=87.15073+2512.30641x      | 1              | 0.01P-4P              | 3.9          | 8.8       | 3.7       | Absolute             | Level 1                  |
| LPE 20:2                  | Negative | y=-8307.69945+357471.13505x | 0.996          | 0.01P-0.5P            | 9.8          | 9.5       | 3.5       | Absolute             | Level 1                  |
| LPE 18:2                  | Negative | y=43209.97393+816122.43664x | 1              | 0.01P-4P              | 6.8          | 6.1       | 1.3       | Absolute             | Level 1                  |
| LPC P-18:1                | Negative | y=-9437.36618+388363.79445x | 0.995          | 0.01P-0.5P            | 5.6          | 5.6       | 5.9       | Absolute             | Level 1                  |
| LPC 22:4                  | Negative | y=449.3903+14715.36812x     | 0.998          | 0.01P-4P              | 2.8          | 2.7       | 1.1       | Absolute             | Level 1                  |
| LPE 18:0                  | Negative | y=1179.05785+37456.79814x   | 1              | 0.01P-4P              | 2.9          | 3.7       | 2.3       | Absolute             | Level 1                  |

| Name                            | Ion mode | Regression Equation         | R <sup>2</sup> | Dynamic range (ng/mL) | Precision(%) | Intra-day | Inter-day | Quantification Level | MSI Identification Level |
|---------------------------------|----------|-----------------------------|----------------|-----------------------|--------------|-----------|-----------|----------------------|--------------------------|
| FA 16:0                         | Negative | y=1326.85301+33509.02409x   | 0.993          | 0.01P-1P              | 2.5          | 6.6       | 5.7       | Absolute             | Level 1                  |
| Pyrazole-1-alanine              | Negative | y=2391.21312+22932.1068x    | 0.997          | 0.02P-2P              | 8.4          | 7.7       | 7         | Absolute             | Level 1                  |
| C 18:1-OH                       | Negative | y=-157.57061+2249.84555x    | 1              | 0.05P-4P              | 7.3          | 6.9       | 2         | Absolute             | Level 1                  |
| Gln-Glu                         | Negative | y=723.37942+3333.00864x     | 0.999          | 0.01P-4P              | 2.2          | 2         | 4.5       | Absolute             | Level 1                  |
| w30-UK                          | Negative | y=11669.38608+555435.34816x | 1              | 0.01P-2P              | 2.3          | 9.3       | 8.4       | Semi-quantitative    | Level 4                  |
| w31-UK                          | Negative | y=219.60501+7317.82028x     | 0.999          | 0.01P-1P              | 3.7          | 13.1      | 3.2       | Semi-quantitative    | Level 4                  |
| w33-UK                          | Negative | y=6041.16201+1668646.00797x | 0.998          | 0.01P-2P              | 9.6          | 9.1       | 2.7       | Semi-quantitative    | Level 4                  |
| w34-UK                          | Negative | y=119.3166+11573.52629x     | 1              | 0.01P-1P              | 6.6          | 4.8       | 6.7       | Semi-quantitative    | Level 4                  |
| w35-UK                          | Negative | y=-788.88438+59980.21938x   | 1              | 0.01P-2P              | 5.8          | 14.7      | 1.8       | Semi-quantitative    | Level 4                  |
| w36-UK                          | Negative | y=2148.21159+50061.35029 x  | 1              | 0.01P-4P              | 0.9          | 0.8       | 2.1       | Semi-quantitative    | Level 4                  |
| w38-UK                          | Negative | y=2225.07653+167173.35555x  | 0.993          | 0.01P-1P              | 6.5          | 6.8       | 3.4       | Semi-quantitative    | Level 4                  |
| w39-UK                          | Negative | y=8.70128+4163.51978x       | 1              | 0.01P-1P              | 4.4          | 12.4      | 12.6      | Semi-quantitative    | Level 4                  |
| 4-Hydroxyglutamate semialdehyde | Negative | y=767.27825+1868.43629x     | 0.998          | 0.01P-2P              | 7.2          | 6.6       | 7.7       | Absolute             | Level 1                  |
| w40-UK                          | Negative | y=-86.16151+21935.62142x    | 1              | 0.02P-1P              | 4.4          | 2.6       | 5.4       | Semi-quantitative    | Level 4                  |
| w41-UK                          | Negative | y=2327.34812+57409.06487x   | 0.999          | 0.02P-1P              | 7.6          | 6.3       | 14.7      | Semi-quantitative    | Level 4                  |
| w42-UK                          | Negative | y=2562.45895+45879.88385x   | 0.997          | 0.01P-4P              | 9.5          | 8.2       | 5.3       | Semi-quantitative    | Level 4                  |

| Name                           | Ion mode | Regression Equation         | R <sup>2</sup> | Dynamic range (ng/mL) | Precision(%) | Intra-day | Inter-day | Quantification Level | MSI Identification Level |
|--------------------------------|----------|-----------------------------|----------------|-----------------------|--------------|-----------|-----------|----------------------|--------------------------|
| w43-UK                         | Negative | y=-448.37522+62101.87221x   | 0.997          | 0.01P-0.5P            | 5            | 3.7       | 2.4       | Semi-quantitative    | Level 4                  |
| w44-UK                         | Negative | y=-1426.26524+101720.37712x | 0.996          | 0.01P-0.5P            | 8.7          | 8.4       | 4.1       | Semi-quantitative    | Level 4                  |
| w45-UK                         | Negative | y=320.77604+9434.1914x      | 0.998          | 0.01P-0.5P            | 3.4          | 13        | 5.5       | Semi-quantitative    | Level 4                  |
| w46-UK                         | Negative | y=682.2643+22025.80035x     | 0.999          | 0.01P-4P              | 6.4          | 5.9       | 5         | Semi-quantitative    | Level 4                  |
| w46-UK                         | Negative | y=14037.68296+337614.27376x | 0.998          | 0.01P-4P              | 8.7          | 16.7      | 5.2       | Semi-quantitative    | Level 4                  |
| w47-UK                         | Negative | y=513.17882+994.19407x      | 0.988          | 0.02P-2P              | 3.5          | 15.1      | 19.5      | Semi-quantitative    | Level 4                  |
| Glu-Gly                        | Negative | y=312.16047+500.74671x      | 0.991          | 0.05P-4P              | 6.7          | 16        | 6.7       | Absolute             | Level 1                  |
| Hydroxybutyric acid            | Negative | y=22875.83558+285797.59953x | 0.996          | 0.01P-2P              | 7.8          | 7.2       | 2.4       | Absolute             | Level 1                  |
| Glu-Leu                        | Negative | y=167.47116+13727.1456x     | 1              | 0.01P-1P              | 5.7          | 4.1       | 3.6       | Absolute             | Level 1                  |
| Tyrosol 4-sulfate              | Negative | y=129.53242+2781.18272x     | 0.998          | 0.01P-4P              | 8.4          | 7.1       | 6.8       | Absolute             | Level 1                  |
| Lactate                        | Negative | y=2911.95286+51386.38845x   | 0.976          | 0.01P-0.5P            | 2            | 1.8       | 1.5       | Absolute             | Level 1                  |
| Glycochenodeoxycholate sulfate | Negative | y=653.67344+23552.90424x    | 0.995          | 0.01P-2P              | 7.9          | 7         | 12.9      | Absolute             | Level 1                  |
| Nonanedioic acid               | Negative | y=9677.62178+16487.85374x   | 0.995          | 0.05P-4P              | 3.3          | 3.2       | 4.5       | Absolute             | Level 1                  |
| Malic acid                     | Negative | y=4709.14917+70760.93443x   | 0.999          | 0.01P-4P              | 3.1          | 2.8       | 3         | Absolute             | Level 1                  |
| Threitol                       | Negative | y=2109.13853+43523.40463x   | 0.998          | 0.01P-2P              | 7.5          | 6.9       | 2.1       | Absolute             | Level 1                  |
| FA C10:0-OH                    | Negative | y=2198.9456+29666.17888x    | 0.996          | 0.01P-4P              | 5.5          | 5.3       | 5.4       | Absolute             | Level 1                  |
| FA 12:1-OH (3 位羟基)             | Negative | y=628.19636+8700.15644x     | 0.996          | 0.01P-4P              | 6.6          | 14.4      | 4.7       | Absolute             | Level 1                  |
| FA 14:1-OH (3 位羟基)             | Negative | y=510.86627+7436.44716x     | 0.996          | 0.01P-4P              | 6.9          | 15.6      | 1.4       | Absolute             | Level 1                  |

| Name                                            | Ion mode | Regression Equation        | R <sup>2</sup> | Dynamic range (ng/mL) | Precision(%) | Intra-day | Inter-day | Quantification Level | MSI Identification Level |
|-------------------------------------------------|----------|----------------------------|----------------|-----------------------|--------------|-----------|-----------|----------------------|--------------------------|
| Dihydrotestosterone                             | Negative | y=6048.944+103539.27716x   | 0.996          | 0.01P-4P              | 6            | 16.2      | 1.7       | Absolute             | Level 1                  |
| {{(2E)-3-phenylprop-2-en-1-yl}oxy}sulfonic acid | Negative | y=10793.9398+399240.42409x | 0.998          | 0.01P-4P              | 9            | 15.2      | 2.1       | Absolute             | Level 1                  |
| FA C18:2-O                                      | Negative | y=920.00866+7139.71092x    | 0.992          | 0.01P-4P              | 7.7          | 7.5       | 15        | Absolute             | Level 1                  |
| Testosterone                                    | Negative | y=36780.47688+1445890x     | 0.992          | 0.01P-2P              | 3.6          | 16.2      | 4.7       | Absolute             | Level 1                  |
| Tetrahydrodeoxycorticosterone sulfate           | Negative | y=1943.65942+34414.72909x  | 0.996          | 0.01P-4P              | 6.8          | 12.8      | 1.8       | Absolute             | Level 1                  |
| PS(2-OMe-19:0/0:0)                              | Negative | y=3950.1867+234806.69171x  | 0.999          | 0.01P-4P              | 2.5          | 2.2       | 3.6       | Absolute             | Level 1                  |
| Biliverdin                                      | Negative | y=90.00709+5394.26984x     | 0.999          | 0.01P-0.5P            | 4            | 13.3      | 6.5       | Absolute             | Level 1                  |

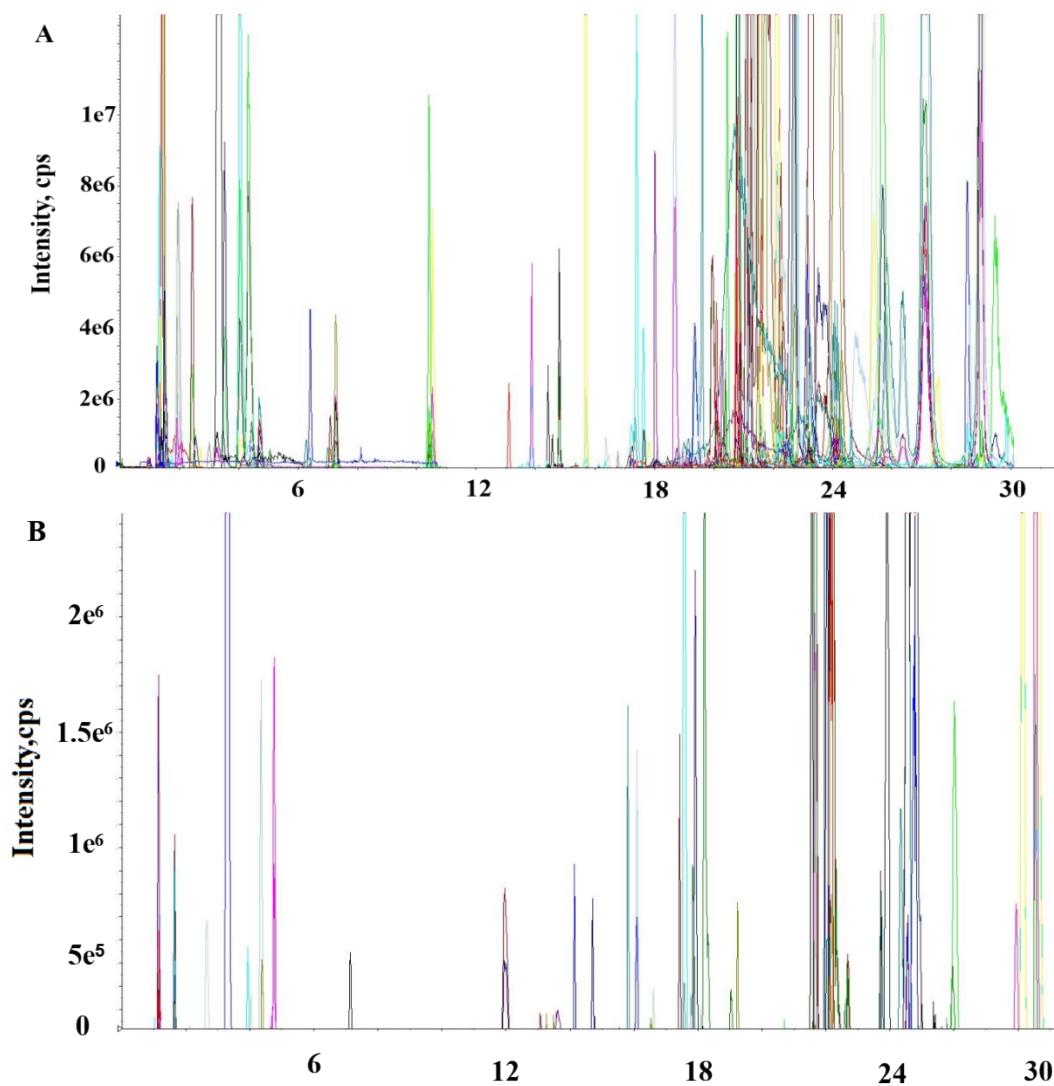

Supporting Figure S1 The total ion chromatograms (XICs) of QC samples in (A) positive ion mode and Negative (B)

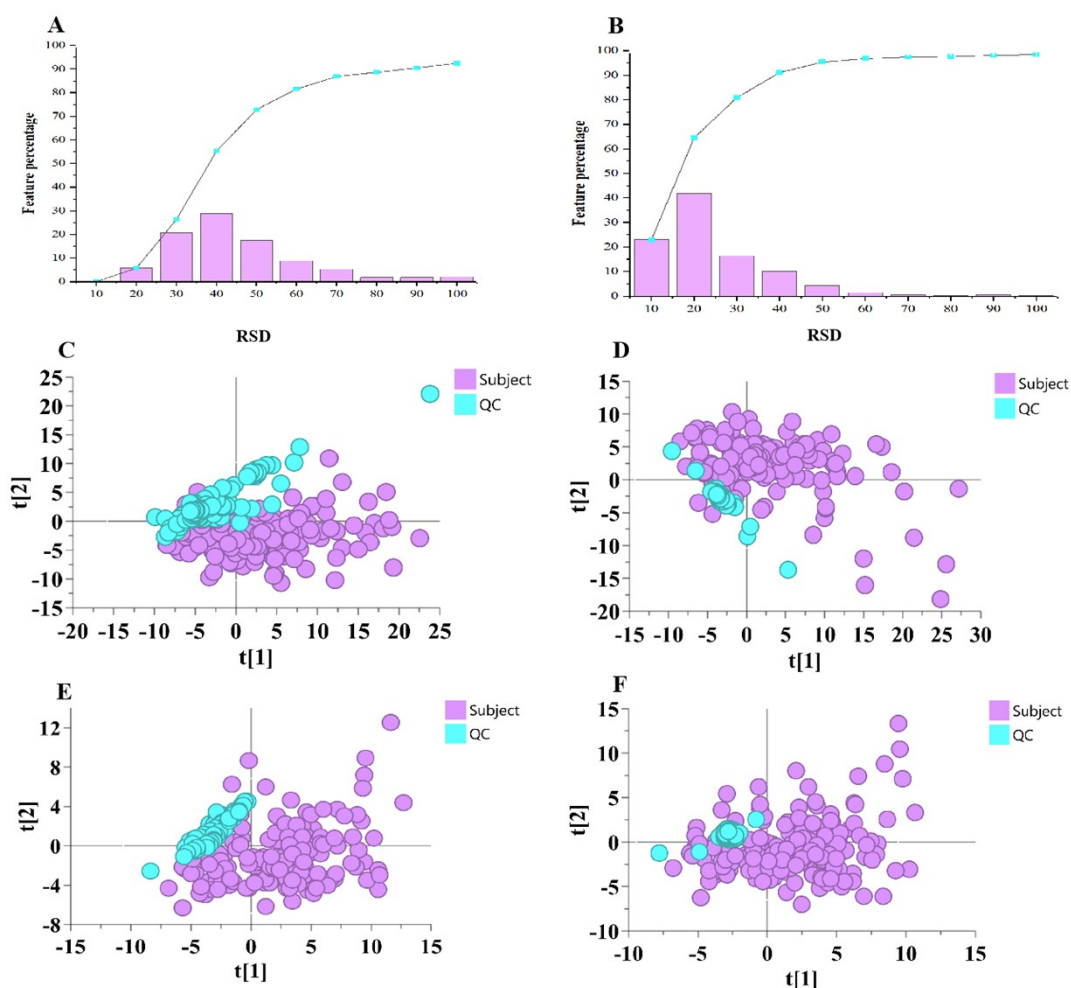

Supporting Figure S2. Principal Component Analysis (PCA) score plots of Quality Control (QC) samples demonstrating data stability before and after Norm ISWSVR correction. (A) PCA scores of QC samples in positive ion mode before (left) and after (right) correction. (B) PCA scores of QC samples in negative ion mode before (left) and after (right) correction. The tight clustering after correction indicates high data reproducibility.

Supporting Table S2. Comparison of the four key metabolites between squamous cell carcinoma and adenocarcinoma

| Metabolite | SCC, median (IQR)                 | ADC, median (IQR)                 | Fold change (SCC/ADC) | P value | FDR-adjusted q value |
|------------|-----------------------------------|-----------------------------------|-----------------------|---------|----------------------|
| Gln_Glu    | 1135.12 (720.42–2564.86)          | 1588.91 (1064.97–3428.09)         | 0.714                 | 0.0826  | 0.33                 |
| GSH        | 707.56 (505.72–955.74)            | 776.44 (484.02–1032.78)           | 0.911                 | 0.773   | 0.997                |
| LPC18:3    | 1704299.17 (839708.38–2765419.40) | 1682658.54 (936126.55–2521819.24) | 1.013                 | 0.982   | 0.997                |
| LPC16:3    | 201171.47 (152518.85–338261.53)   | 206149.23 (122077.92–321122.68)   | 0.976                 | 0.997   | 0.997                |

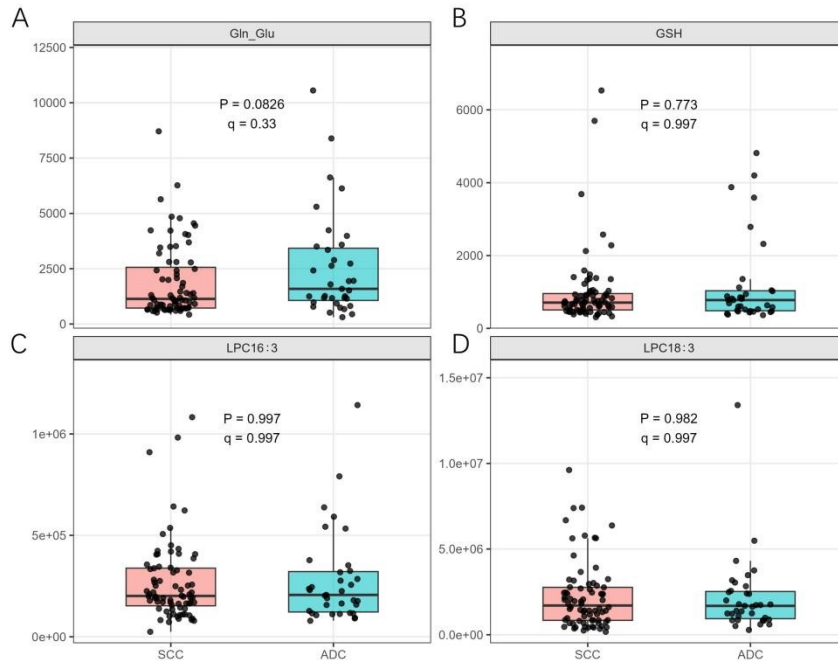

Supporting Figure S3. Box plot of the four key metabolites between squamous cell carcinoma and adenocarcinoma. (A) Gln\_Glu; (B) GSH ; (C) LPC18:3; (D) LPC16:3.

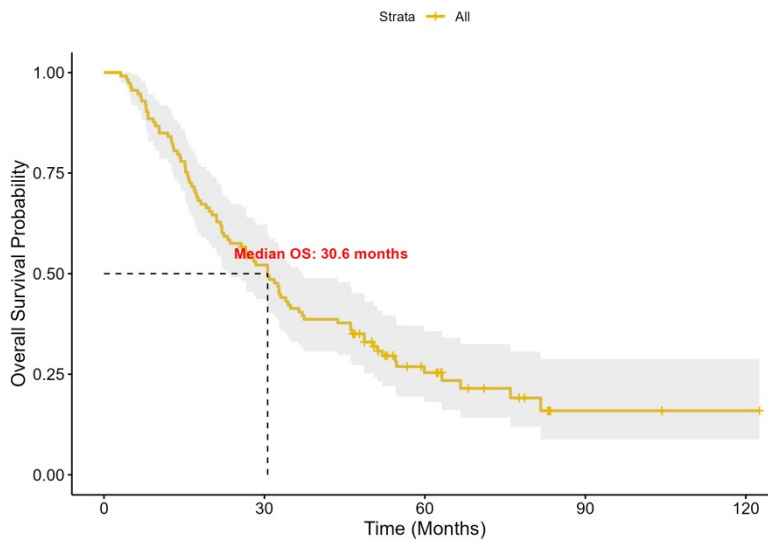

Supporting Figure S4. Kaplan-Meier curve showing the median overall survival.
